# Supplementary material
Source: HighWire-hosted journal article supplement (https://bmjopen.bmj.com/content/12/5/e054768)
Supplement: inline-supplementary-material-1 [file inline-supplementary-material-1.pdf]

## Appendix: Survey questionnaire

| We kindly request you to indicate your agreement with the following 40 statements using a five-point scale: |                                                                                                                                                                                 |   |   |   |   |   |
|-------------------------------------------------------------------------------------------------------------|---------------------------------------------------------------------------------------------------------------------------------------------------------------------------------|---|---|---|---|---|
| ① Strongly Disagree ② Disagree ③ Neutral or Don't Know ④ Agree ⑤ Strongly Agree                             |                                                                                                                                                                                 |   |   |   |   |   |
| <b>ANTIMICROBIAL RESISTANCE: SCOPE OF THE PROBLEM AND KEY CONTRIBUTORS</b>                                  |                                                                                                                                                                                 |   |   |   |   |   |
| 1.                                                                                                          | Antimicrobial resistance is a significant problem in this hospital                                                                                                              | ① | ② | ③ | ④ | ⑤ |
| 2.                                                                                                          | Antimicrobial resistance is a significant problem in Indonesia                                                                                                                  | ① | ② | ③ | ④ | ⑤ |
| 3.                                                                                                          | A cause of antimicrobial resistance is using too many antimicrobial drugs                                                                                                       | ① | ② | ③ | ④ | ⑤ |
| 4.                                                                                                          | Lack of hand disinfection by healthcare workers causes spread of antimicrobial resistance                                                                                       | ① | ② | ③ | ④ | ⑤ |
| 5.                                                                                                          | Use of broad-spectrum antibiotics can increase antimicrobial resistance when narrower-spectrum antibiotics are available that are equally effective                             | ① | ② | ③ | ④ | ⑤ |
| 6.                                                                                                          | Antibiotic resistance is also a problem outside of the hospital, in communities                                                                                                 | ① | ② | ③ | ④ | ⑤ |
| 7.                                                                                                          | In this hospital, patient rooms are cleaned according to hospital cleaning protocol once a patient with a multidrug-resistant organism (MDRO) has been discharged               | ① | ② | ③ | ④ | ⑤ |
| 8.                                                                                                          | Adherence to hand-hygiene protocols is excellent at this hospital                                                                                                               | ① | ② | ③ | ④ | ⑤ |
| 9.                                                                                                          | This hospital does NOT provide adequate staff education regarding multidrug-resistant organisms                                                                                 | ① | ② | ③ | ④ | ⑤ |
| 10.                                                                                                         | A patient is likely to develop an infection with a multidrug-resistant organism during their stay at this hospital                                                              | ① | ② | ③ | ④ | ⑤ |
| <b>ANTIBIOTIC PRESCRIBING PRACTICES</b>                                                                     |                                                                                                                                                                                 |   |   |   |   |   |
| 11.                                                                                                         | Antibiotics are overused in Indonesia                                                                                                                                           | ① | ② | ③ | ④ | ⑤ |
| 12.                                                                                                         | Antibiotics are overused in this hospital                                                                                                                                       | ① | ② | ③ | ④ | ⑤ |
| 13.                                                                                                         | Microbiology laboratory results are efficiently communicated to the treating physician                                                                                          | ① | ② | ③ | ④ | ⑤ |
| 14.                                                                                                         | I regularly refer to/consider the antibiotic susceptibility patterns at this hospital/institution (i.e. the institutional antibiogram) when empirically prescribing antibiotics | ① | ② | ③ | ④ | ⑤ |
| 15.                                                                                                         | If medically appropriate, intravenous antibiotics should be stepped down to an oral alternative after three days                                                                | ① | ② | ③ | ④ | ⑤ |
| 16.                                                                                                         | Restrictions on antibiotics impair my ability to provide good patient care                                                                                                      | ① | ② | ③ | ④ | ⑤ |
| 17.                                                                                                         | More judicious use of antibiotics would decrease antimicrobial resistance                                                                                                       | ① | ② | ③ | ④ | ⑤ |
| 18.                                                                                                         | Following evidence-based antibiotic guidelines will help optimize treatment outcomes                                                                                            | ① | ② | ③ | ④ | ⑤ |
| 19.                                                                                                         | In general, rational antibiotic prescribing for my patients is high on my list of priorities                                                                                    | ① | ② | ③ | ④ | ⑤ |
| 20.                                                                                                         | Developing hospital antibiotic guidelines is more useful than applying international guidelines                                                                                 | ① | ② | ③ | ④ | ⑤ |
| 21.                                                                                                         | I am often unsure if a patient needs an antibiotic or not                                                                                                                       | ① | ② | ③ | ④ | ⑤ |

|                                                                                             |                                                                                                                                                                                                                                   |                                                                                                                                                                                                                                                               |                                                                                                                                                                                                                         |                                                                                                                                                                                          |   |   |
|---------------------------------------------------------------------------------------------|-----------------------------------------------------------------------------------------------------------------------------------------------------------------------------------------------------------------------------------|---------------------------------------------------------------------------------------------------------------------------------------------------------------------------------------------------------------------------------------------------------------|-------------------------------------------------------------------------------------------------------------------------------------------------------------------------------------------------------------------------|------------------------------------------------------------------------------------------------------------------------------------------------------------------------------------------|---|---|
| 22.                                                                                         | I am often unsure which antibiotic to prescribe                                                                                                                                                                                   | ①                                                                                                                                                                                                                                                             | ②                                                                                                                                                                                                                       | ③                                                                                                                                                                                        | ④ | ⑤ |
| 23.                                                                                         | I will stop antibiotics that others have prescribed in the absence of an appropriate indication                                                                                                                                   | ①                                                                                                                                                                                                                                                             | ②                                                                                                                                                                                                                       | ③                                                                                                                                                                                        | ④ | ⑤ |
| 24.                                                                                         | Patients with high fever ( $\geq 39^{\circ}\text{C}$ ) must be treated with antibiotics                                                                                                                                           | ①                                                                                                                                                                                                                                                             | ②                                                                                                                                                                                                                       | ③                                                                                                                                                                                        | ④ | ⑤ |
| 25.                                                                                         | If I am uncertain about the diagnosis of infection, but think it is possible, I feel safer prescribing an antibiotic                                                                                                              | ①                                                                                                                                                                                                                                                             | ②                                                                                                                                                                                                                       | ③                                                                                                                                                                                        | ④ | ⑤ |
| 26.                                                                                         | Fear of patient deterioration or complications leads me to prescribe antibiotics more freely                                                                                                                                      | ①                                                                                                                                                                                                                                                             | ②                                                                                                                                                                                                                       | ③                                                                                                                                                                                        | ④ | ⑤ |
| 27.                                                                                         | I frequently prescribe antibiotics because patients or their relatives insist on it                                                                                                                                               | ①                                                                                                                                                                                                                                                             | ②                                                                                                                                                                                                                       | ③                                                                                                                                                                                        | ④ | ⑤ |
| <b>ANTIMICROBIAL STEWARDSHIP PROGRAM (ASP)</b>                                              |                                                                                                                                                                                                                                   |                                                                                                                                                                                                                                                               |                                                                                                                                                                                                                         |                                                                                                                                                                                          |   |   |
| <i>A formal program formal that monitors and manages the appropriate use of antibiotics</i> |                                                                                                                                                                                                                                   |                                                                                                                                                                                                                                                               |                                                                                                                                                                                                                         |                                                                                                                                                                                          |   |   |
| 28.                                                                                         | I am aware that my hospital has an antimicrobial stewardship program (ASP)                                                                                                                                                        | ①                                                                                                                                                                                                                                                             | ②                                                                                                                                                                                                                       | ③                                                                                                                                                                                        | ④ | ⑤ |
| 29.                                                                                         | I understand what the purpose of ASP is                                                                                                                                                                                           | ①                                                                                                                                                                                                                                                             | ②                                                                                                                                                                                                                       | ③                                                                                                                                                                                        | ④ | ⑤ |
| 30.                                                                                         | ASP improve patient care                                                                                                                                                                                                          | ①                                                                                                                                                                                                                                                             | ②                                                                                                                                                                                                                       | ③                                                                                                                                                                                        | ④ | ⑤ |
| 31.                                                                                         | ASP reduces the problem of antimicrobial resistance                                                                                                                                                                               | ①                                                                                                                                                                                                                                                             | ②                                                                                                                                                                                                                       | ③                                                                                                                                                                                        | ④ | ⑤ |
| 32.                                                                                         | ASP reduces this hospital's infection rates                                                                                                                                                                                       | ①                                                                                                                                                                                                                                                             | ②                                                                                                                                                                                                                       | ③                                                                                                                                                                                        | ④ | ⑤ |
| 33.                                                                                         | Additional staff education on antimicrobial prescribing is needed                                                                                                                                                                 | ①                                                                                                                                                                                                                                                             | ②                                                                                                                                                                                                                       | ③                                                                                                                                                                                        | ④ | ⑤ |
| 34.                                                                                         | Regular audit and feedback encourage me to prescribe antibiotics prudently                                                                                                                                                        | ①                                                                                                                                                                                                                                                             | ②                                                                                                                                                                                                                       | ③                                                                                                                                                                                        | ④ | ⑤ |
| 35.                                                                                         | Rapid and accurate diagnostic tests are useful for diagnosis of infectious diseases and guidance on antibiotic therapy                                                                                                            | ①                                                                                                                                                                                                                                                             | ②                                                                                                                                                                                                                       | ③                                                                                                                                                                                        | ④ | ⑤ |
| 36.                                                                                         | To reduce antibiotic overuse in hospitals, implementation of antibiotic restriction (e.g., antibiotic tiers) is a useful measure                                                                                                  | ①                                                                                                                                                                                                                                                             | ②                                                                                                                                                                                                                       | ③                                                                                                                                                                                        | ④ | ⑤ |
| 37.                                                                                         | To curb antimicrobial resistance, regular consultations or ward rounds with a clinical microbiologist or infectious disease physician are useful                                                                                  | ①                                                                                                                                                                                                                                                             | ②                                                                                                                                                                                                                       | ③                                                                                                                                                                                        | ④ | ⑤ |
| 38.                                                                                         | To curb antimicrobial resistance, doctors need to have timely access to microbiological test results to guide antibiotic therapy                                                                                                  | ①                                                                                                                                                                                                                                                             | ②                                                                                                                                                                                                                       | ③                                                                                                                                                                                        | ④ | ⑤ |
| 39.                                                                                         | Up-to-date information on hospital antimicrobial resistance patterns is important for developing hospital antibiotic guidelines                                                                                                   | ①                                                                                                                                                                                                                                                             | ②                                                                                                                                                                                                                       | ③                                                                                                                                                                                        | ④ | ⑤ |
| 40.                                                                                         | Effective infection prevention and control in the hospital reduces antimicrobial resistance                                                                                                                                       | ①                                                                                                                                                                                                                                                             | ②                                                                                                                                                                                                                       | ③                                                                                                                                                                                        | ④ | ⑤ |
| <b>BACKGROUND INFORMATION</b>                                                               |                                                                                                                                                                                                                                   |                                                                                                                                                                                                                                                               |                                                                                                                                                                                                                         |                                                                                                                                                                                          |   |   |
| 41.                                                                                         | What is your primary work unit in this hospital? <b>Tick ONE</b>                                                                                                                                                                  |                                                                                                                                                                                                                                                               |                                                                                                                                                                                                                         |                                                                                                                                                                                          |   |   |
|                                                                                             | <input type="radio"/> Many different unit/not specific<br><input type="radio"/> Emergency department<br><input type="radio"/> Surgery<br><input type="radio"/> Anaesthesiology<br><input type="radio"/> Intensive Care Unit (ALL) | <input type="radio"/> OBGYN (Obstetrics/ Gynaecology)<br><input type="radio"/> Internal Medicine<br><input type="radio"/> Neurology<br><input type="radio"/> Paediatrics<br><input type="radio"/> Psychiatrics<br><input type="radio"/> ENT (Ear Nose Throat) | <input type="radio"/> Eye<br><input type="radio"/> Dermato-venerology<br><input type="radio"/> Pulmonology<br><input type="radio"/> Cardiology<br><input type="radio"/> Orthopaedics<br><input type="radio"/> Radiology | <input type="radio"/> Rehabilitation<br><input type="radio"/> Pharmacy<br><input type="radio"/> Microbiology<br><input type="radio"/> Laboratory<br><input type="radio"/> Other<br><hr/> |   |   |

|                                              |                                                                                                                                                                                |                                               |                                                    |
|----------------------------------------------|--------------------------------------------------------------------------------------------------------------------------------------------------------------------------------|-----------------------------------------------|----------------------------------------------------|
| <b>42.</b>                                   | How long have you worked in this hospital? <b>Tick ONE</b>                                                                                                                     |                                               |                                                    |
|                                              | <input type="radio"/> Less than 1 year                                                                                                                                         | <input type="radio"/> 6 – 10 years            | <input type="radio"/> 16 - 20 years                |
|                                              | <input type="radio"/> 1 – 5 years                                                                                                                                              | <input type="radio"/> 11 – 15 years           | <input type="radio"/> More than 20 years           |
| <b>43.</b>                                   | What is your position in this hospital? <b>Tick ONE</b>                                                                                                                        |                                               |                                                    |
|                                              | <input type="radio"/> Internship doctor                                                                                                                                        | <input type="radio"/> Resident                | <input type="radio"/> Other                        |
|                                              | <input type="radio"/> General Practitioner                                                                                                                                     | <input type="radio"/> Specialist              | _____                                              |
| <b>44.</b>                                   | How long have you worked in your current specialty or profession? <b>Tick ONE</b>                                                                                              |                                               |                                                    |
|                                              | <input type="radio"/> Less than 1 year                                                                                                                                         | <input type="radio"/> 6 – 10 years            | <input type="radio"/> 16 - 20 years                |
|                                              | <input type="radio"/> 1 – 5 years                                                                                                                                              | <input type="radio"/> 11 – 15 years           | <input type="radio"/> More than 20 years           |
| <b>45.</b>                                   | Which of the following resources do you use to guide your antibiotic prescribing? <b>Tick ALL that apply</b>                                                                   |                                               |                                                    |
|                                              | <input type="radio"/> Consultation with senior colleague(s)                                                                                                                    | <input type="checkbox"/> Guideline            | <input type="radio"/> Medical journal              |
|                                              | <input type="radio"/> Consultation with specialist in microbiology/infectious disease                                                                                          | <input type="checkbox"/> Internacional        | <input type="radio"/> Phamaceutical representative |
|                                              | <input type="radio"/> Textbooks                                                                                                                                                | <input type="checkbox"/> Nasional             | _____                                              |
|                                              |                                                                                                                                                                                | <input type="checkbox"/> Hospital             | <input type="radio"/> Internet _____               |
|                                              |                                                                                                                                                                                | <input type="checkbox"/> Departement/division | <input type="radio"/> Other _____                  |
| <b>46.</b>                                   | During the past year, how many times have you received training/teaching or attended seminars/courses on antimicrobial prescribing, resistance and/or stewardship? _____ times |                                               |                                                    |
| <b>47.</b>                                   | What is your sex: <input type="radio"/> Male <input type="radio"/> Female                                                                                                      |                                               |                                                    |
| <b>48.</b>                                   | I would like to take part in the raffle: <input type="radio"/> yes <input type="radio"/> no If yes, my email is: _____                                                         |                                               |                                                    |
| <b>Thank you for completing this survey!</b> |                                                                                                                                                                                |                                               |                                                    |
